# Supplementary material for: Early Strokes Are Associated with More Global Cognitive Deficits in Adults with Sickle Cell Disease
Source: MDPI journal article supplement (doi:10.3390/jcm12041615), 2023-02-17

Supplemental Figure S1. Initial eigenvalue and screeplot of the principal component analysis of cognitive tests

Initial Eigenvalues

| Component | Eigenvalue | % of Variance | Cumulative % |
|-----------|------------|---------------|--------------|
| 1         | 7.8667     | 41.40392      | 41.4         |
| 2         | 1.8584     | 9.78124       | 51.2         |
| 3         | 1.5278     | 8.04102       | 59.2         |
| 4         | 1.3627     | 7.17234       | 66.4         |
| 5         | 1.0648     | 5.60434       | 72.0         |
| 6         | 0.9095     | 4.78699       | 76.8         |
| 7         | 0.7698     | 4.05148       | 80.8         |
| 8         | 0.6935     | 3.65003       | 84.5         |
| 9         | 0.5991     | 3.15307       | 87.6         |
| 10        | 0.4869     | 2.56260       | 90.2         |
| 11        | 0.4533     | 2.38592       | 92.6         |
| 12        | 0.3456     | 1.81907       | 94.4         |
| 13        | 0.2893     | 1.52253       | 95.9         |
| 14        | 0.2609     | 1.37297       | 97.3         |
| 15        | 0.2243     | 1.18070       | 98.5         |
| 16        | 0.1527     | 0.80347       | 99.3         |
| 17        | 0.0998     | 0.52536       | 99.8         |
| 18        | 0.0339     | 0.17819       | 100.0        |
| 19        | 9.07e-4    | 0.00477       | 100.0        |

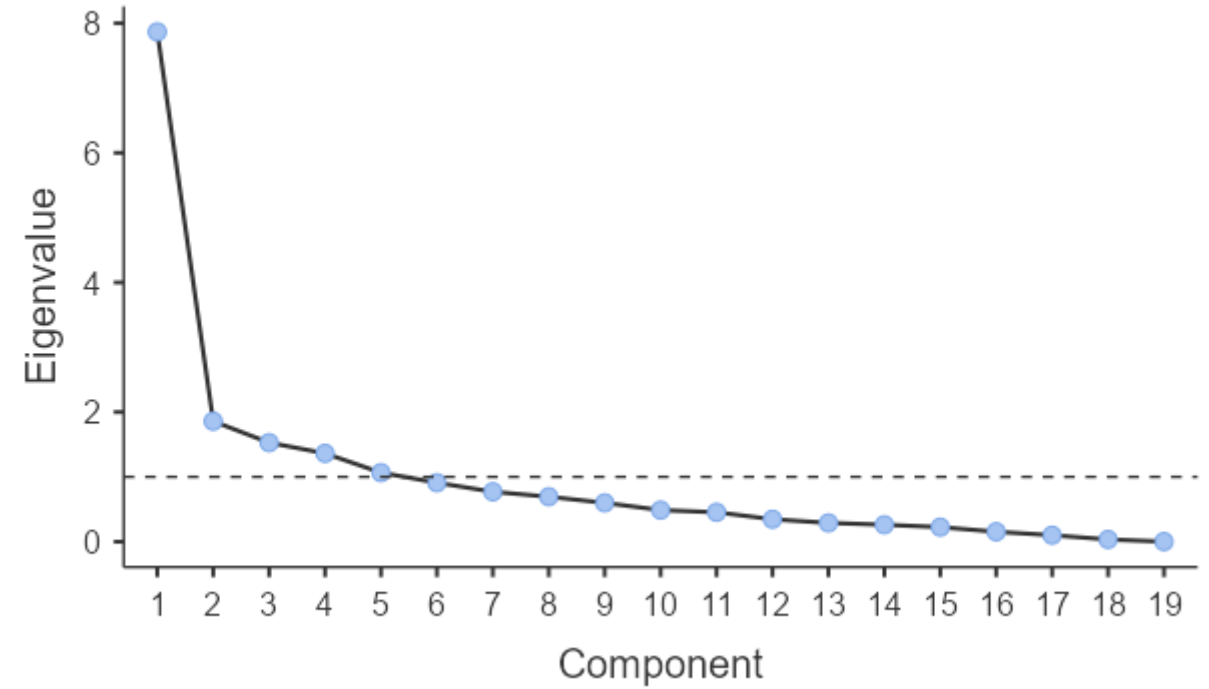

Supplement: s1 [file s1]
